# Supplementary material
Source: PubMed Central journal article supplement (PMC6704748)
Supplement: jamapediatr-173-969-s001.pdf [file jamapediatr-173-969-s001.pdf]

## Supplementary Online Content

Butwicka A, Olén O, Larsson H, et al. Association of childhood-onset inflammatory bowel disease with risk of psychiatric disorders and suicide attempt. *JAMA Pediatr*. Published online August 19, 2019. doi:10.1001/jamapediatrics.2019.2662

**eTable 1.** Previous Studies of Inflammatory Bowel Disease (IBD) and Risk of Psychiatric Outcome in Childhood-Onset IBD, Adult-Onset IBD and Mixed IBD Patients (Both Childhood- and Adult-Onset)

**eTable 2.** *International Classification of Diseases (ICD) Codes Defining Inflammatory Bowel Disease (IBD)*

**eTable 3.** *ICD Codes Used to Define Different Psychiatric Disorders and Suicide Attempts in the Study*

**eTable 4.** Extraintestinal Manifestations and Primary Sclerosing Cholangitis in Patients with Inflammatory Bowel Disease (IBD) As defined by *ICD-9* and *ICD-10* Codes

**eTable 5.** Surgery Codes Included in the Definitions of “Inflammatory Bowel Disease-Related Bowel Surgery and Perianal Surgery” (Since 1964)

**eTable 6.** Hazard Ratios of Primary and Secondary Psychiatric Outcomes Diagnosed Before and After 18th Birthday in the Cohort of Patients With Childhood Onset (<18 Years) Stratified by Type of IBD Diagnosis—Patients With IBD Compared With Matched General Population Reference Individuals

**eTable 7.** Hazard Ratios of Primary and Secondary Psychiatric Outcomes Diagnosed Before and After 18th Birthday in the Cohort of Patients With Childhood Onset (<18 Years) Stratified by Type of IBD Diagnosis—Patients With IBD Compared With Matched General Population Reference Individuals

**eTable 8.** Hazard Ratio of Primary and Secondary Psychiatric Outcomes in the Cohort of Patients With Childhood Onset (<18 Years) Stratified by Time After Cohort Entry (Diagnosis of Inflammatory Bowel Disease or Respected Date in Reference Individuals)—IBD Compared With Matched General Population Reference Individuals

**eTable 9.** Hazard Ratio of the First Ever Event of Any Psychiatric Disorders in the Cohort of Patients With Childhood Onset (<18 Years)—IBD Compared With Matched General Population Reference Individuals

This supplementary material has been provided by the authors to give readers additional information about their work.

**eTable 1.** Previous Studies of Inflammatory Bowel Disease (IBD) and Risk of Psychiatric Outcome in Childhood-Onset IBD, Adult-Onset IBD and Mixed IBD Patients (Both Childhood- and Adult-Onset)

| Study                                         | Country, study period (population)         | Number of IBD patients                   | Age at IBD onset, years               | Age at the end of follow-up, years | Psychiatric outcome, number (%)                                                                                       | Psychiatric outcome: Relative risk estimate (95% CI)                                                                       | Assessment / Diagnosis criteria                                | Time of follow-up, years   | Patient years of follow-up in IBD patients                    | Incidence per 1000 person-years (95%CI)                                                                 | Time of follow-up, up to 18 yrs/over 18 yrs |
|-----------------------------------------------|--------------------------------------------|------------------------------------------|---------------------------------------|------------------------------------|-----------------------------------------------------------------------------------------------------------------------|----------------------------------------------------------------------------------------------------------------------------|----------------------------------------------------------------|----------------------------|---------------------------------------------------------------|---------------------------------------------------------------------------------------------------------|---------------------------------------------|
| <b>Childhood-onset IBD</b>                    |                                            |                                          |                                       |                                    |                                                                                                                       |                                                                                                                            |                                                                |                            |                                                               |                                                                                                         |                                             |
| Loftus, 2011                                  | USA, 2000-2006 (CD patients)               | CD: 2144                                 | Range 0-18<br>Mean 11.8               | -                                  | Depression: 118 (5.5)<br>Anxiety: 81 (3.8)                                                                            | Depression: 1.7 (1.4-2.3)<br>Anxiety: 2.3 (1.7-3.2)                                                                        | Register data/ICD-9 CM                                         | -                          | -                                                             | Depression: 26.9<br>Anxiety: 18.1                                                                       | yes/no                                      |
| Virta, 2014                                   | Finland, 2006-2010, (IBD patients)         | IBD: 248                                 | Range 6-16<br>Median (IQR) 12 (10-13) | Median <sup>a</sup> 14             | Antidepressants: 8 (3.2)<br>ADHD drugs: 2 (0.8)                                                                       | Antidepressants: 2.7 (1.1-6.7) <sup>a</sup><br>ADHD drugs: NS                                                              | Register data/Dispensed prescriptions                          | Median (IQR) 2.1 (1.5-3.0) | -                                                             | -                                                                                                       | yes/no                                      |
| Our study                                     | Sweden, 1973-2013 (UC, CD, IBD-U patients) | IBD: 6464 (UC: 3228 CD: 2536 IBD-U: 700) | Median (IQR) 14 (11-16)               | Median (IQR) 23 (18-29)            | Any psychiatric disorders: 1,117 (17.3)<br>Suicide attempts: 117 (1.8)<br>Specific psychiatric disorders: see results | Any psychiatric disorders: 1.6 (1.5-1.7)<br>Suicide attempts: 1.4 (1.2-1.7)<br>Specific psychiatric disorders: see results | Register data/ICD-8, ICD-9, ICD-10, ADHD medicine prescription | Median (IQR) 9 (4-15)      | Any psychiatric disorders: 65,503<br>Suicide attempts: 71,147 | Any psychiatric disorders: 17.1<br>Suicide attempts: 1.6<br>Specific psychiatric disorders: see results | yes/yes                                     |
| <b>Adult-onset IBD and mixed IBD patients</b> |                                            |                                          |                                       |                                    |                                                                                                                       |                                                                                                                            |                                                                |                            |                                                               |                                                                                                         |                                             |
| Persson, 1996                                 | Sweden, 1955-1990 (IBD patients)           | UC: 1547<br>CD: 1251                     | 0-60+                                 | -                                  | Completed suicide UC:5<br>CD:9                                                                                        | Completed suicide UC: 0.8 (0.3-1.8)<br>CD: 1.9 (0.9-3.0)                                                                   | Register data/ICD-6 to 9                                       | >15                        | -                                                             | -                                                                                                       | NA                                          |
| Jess, 2002                                    | Denmark, 1962-1997 (IBD patients)          | CD: 374                                  | 0-80+                                 | -                                  | Completed suicide: 1 (0.0)                                                                                            | Completed suicide: NS                                                                                                      | Register data/ICD-10                                           | Median (Range)             | 6,569                                                         | Completed suicide: 0.15                                                                                 | NA                                          |

| Study        | Country, study period (population)                                   | Number of IBD patients | Age at IBD onset, years        | Age at the end of follow-up, years  | Psychiatric outcome, number (%)                                                                                                                                                                                                                                                                                                                                                               | Psychiatric outcome: Relative risk estimate (95% CI)                                                                                                                                                                                                                                                                              | Assessment / Diagnosis criteria | Time of follow-up, years    | Patient years of follow-up in IBD patients | Incidence per 1000 person-years (95%CI) | Time of follow-up, up to 18 yrs/over 18 yrs |
|--------------|----------------------------------------------------------------------|------------------------|--------------------------------|-------------------------------------|-----------------------------------------------------------------------------------------------------------------------------------------------------------------------------------------------------------------------------------------------------------------------------------------------------------------------------------------------------------------------------------------------|-----------------------------------------------------------------------------------------------------------------------------------------------------------------------------------------------------------------------------------------------------------------------------------------------------------------------------------|---------------------------------|-----------------------------|--------------------------------------------|-----------------------------------------|---------------------------------------------|
|              |                                                                      |                        |                                |                                     |                                                                                                                                                                                                                                                                                                                                                                                               |                                                                                                                                                                                                                                                                                                                                   |                                 | ) 17 (1-36)                 |                                            |                                         |                                             |
| Jess, 2006   | USA, 1940–2004 (IBD patients)                                        | UC: 378<br>CD: 314     | Median<br>UC: 33.3<br>CD: 28.9 | -                                   | Completed suicide:<br>UC: 1 (0.0)<br>CD: 0 (0.0)                                                                                                                                                                                                                                                                                                                                              | Completed suicide: NS                                                                                                                                                                                                                                                                                                             | Register data/ICD               | Median (Range)<br>14 (0-58) | 11,307                                     | -                                       | NA                                          |
| Walker, 2008 | Canada, USA, New Zealand, 2002-2004 (IBD patients)                   | IBD: 351               | Mean (SD)<br>36.5 (14.5)       | Range 19-81<br>Mean (SD)<br>43 (14) | <u>Mood disorder</u> <sup>a</sup><br>Major Depression: 32 (9.1) <sup>m</sup> /95 (27.2) <sup>l</sup><br>Bipolar disorder: 4 (1.1) <sup>m</sup> /6 (1.7) <sup>l</sup><br><u>Anxiety disorder</u> <sup>a</sup><br>Panic: 13 (3.7) <sup>m</sup> /28 (8.0) <sup>l</sup><br>Agoraphobia: 2 (0.6) <sup>m</sup> /4 (1.1) <sup>l</sup><br>Social anxiety: 9 (2.6) <sup>m</sup> /21 (6.0) <sup>l</sup> | <u>Mood disorder</u><br>Major Depression: NS <sup>m</sup> /2.2 (1.6-2.9) <sup>l</sup><br>Bipolar disorder: NS <sup>m</sup> /NS <sup>l</sup><br><u>Anxiety disorder</u><br>Panic: NS <sup>m</sup> /NS <sup>l</sup><br>Agoraphobia: NS <sup>m</sup> /NS <sup>l</sup><br>Social anxiety: NS <sup>m</sup> /0.5 (0.3-0.8) <sup>l</sup> | CIDI interview /DSM-IV          | 2                           | NA                                         | NA                                      | NA                                          |
| Eaton, 2010  | Denmark 1977-2006 (patients with bipolar disorder and schizophrenia) | UC: 54<br>CD: 38       | -                              | -                                   | Bipolar disorder:<br>UC: 31 <sup>c</sup> /23 <sup>d</sup><br>CD: 16 <sup>c</sup> /22 <sup>d</sup><br>Schizophrenia:<br>UC: 28 <sup>c</sup> /35 <sup>d</sup><br>CD: 11 <sup>c</sup> /28 <sup>d</sup>                                                                                                                                                                                           | Bipolar disorder:<br>UC: 1.8 <sup>c</sup> /NS <sup>d</sup><br>CD: 1.9 <sup>c</sup> /1.8 <sup>d</sup><br>Schizophrenia:<br>UC: NS <sup>c</sup> /NS <sup>d</sup><br>CD: NS <sup>c</sup> /1.7 <sup>d</sup>                                                                                                                           | Register data/ICD-8, ICD-10     | >5yr                        | NA                                         | NA                                      | NA                                          |
| Gradus, 2010 | Denmark, 1981-2006 (completed suicide cases)                         | UC: 897<br>CD: 445     | -                              | 15-90                               | NA                                                                                                                                                                                                                                                                                                                                                                                            | Completed suicide:<br>UC: 1.7 (1.3-2.1)<br>CD: 1.6 (1.1-2.3)                                                                                                                                                                                                                                                                      | Register data/ICD-8, ICD-10     | NA                          | NA                                         | NA                                      | NA                                          |

| Study           | Country, study period (population) | Number of IBD patients | Age at IBD onset, years                        | Age at the end of follow-up, years  | Psychiatric outcome, number (%)                   | Psychiatric outcome: Relative risk estimate (95% CI)                                                                            | Assessment / Diagnosis criteria | Time of follow-up, years        | Patient years of follow-up in IBD patients | Incidence per 1000 person-years (95%CI)                                                                                                                                   | Time of follow-up, up to 18 yrs/over 18 yrs |
|-----------------|------------------------------------|------------------------|------------------------------------------------|-------------------------------------|---------------------------------------------------|---------------------------------------------------------------------------------------------------------------------------------|---------------------------------|---------------------------------|--------------------------------------------|---------------------------------------------------------------------------------------------------------------------------------------------------------------------------|---------------------------------------------|
| Goodhand, 2012  | UK, 2008-2011 (IBD patients)       | UC: 103<br>CD: 101     | Mean (SD)<br>UC: 27.3 (1.2)<br>CD: 28.6 (13.1) | Range 18-75<br>Mean (SD)<br>42 (14) | NA                                                | Symptoms of depression and anxiety: NA                                                                                          | HADS scale/score                | NA                              | NA                                         | NA                                                                                                                                                                        | NA                                          |
| Jess, 2013      | Denmark, 1982-2010 (IBD patients)  | UC: 36080<br>CD: 15362 | Range 0-80+<br>Median<br>UC: 45.2<br>CD: 36.3  | -                                   | Completed suicide<br>UC: 81 (0.2)<br>CD: 32 (0.2) | Completed suicide:<br>UC: 1.3 (1.1-1.5)<br>CD: NS                                                                               | Register data/ICD-8, ICD-10     | >10                             | -                                          | -                                                                                                                                                                         | NA                                          |
| Bernstein, 2019 | Canada, 1989-2012 (IBD patients)   | IBD: 5346              | Range 18-65+<br>Mean (SD)<br>43 (17)           | -                                   | -                                                 | Depression: 1.4 (1.3-1.5)<br>Anxiety disorder: 1.4 (1.3-1.5)<br>Bipolar disorder: 1.8 (1.4-2.3)<br>Schizophrenia: 1.6 (0.9-2.8) | Register data/ICD-9, ICD-10     | Median (IQR)<br>10.4 (5.0-16.4) | -                                          | Depression: 18.6 (95% CI, 14.2-24.3)<br>Anxiety disorder: 25.0 (95% CI, 19.6-32.0)<br>Bipolar disorder: 3.80 (95% CI, 2.29-6.30)<br>Schizophrenia : 4.6 (95% CI, 3.1-6.8) | NA                                          |

a, Values calculated with use of numbers provided in the manuscript; ADHD, Attention-deficit hyperactivity disorder; c, Concurrent risk within the first 4 complete years following date of onset of the autoimmune disease. CD, Crohn's Disease; CI, Confidence Interval; CIDI, The Comprehensive International Diagnostic Interview; d, Delayed risk  $\geq$  5 years after date of onset of the autoimmune disease; DSM-IV, Diagnostic and Statistical Manual of Mental Disorders 4th Edition; HADS, Hospital Anxiety and Depression Scale; IBD, inflammatory bowel disease; IBD-U, inflammatory bowel disease unclassified; ICD, International Classification of Diseases; IQR, interquartile range; l, The lifetime prevalence rates of psychiatric disorders for the IBD cohort; m, The 12-month prevalence rates of psychiatric disorders for the IBD cohort; NA=Not applicable; NS, Not Statistically Significant; UC, Ulcerative colitis; -, information not available.

**eTable 2.** *International Classification of Diseases (ICD) Codes Defining Inflammatory Bowel Disease (IBD)*

|                          | <b>ICD-8</b>             | <b>ICD-9</b>     | <b>ICD-10</b>     |
|--------------------------|--------------------------|------------------|-------------------|
|                          | <b>1969-1986</b>         | <b>1987-1996</b> | <b>1997-</b>      |
| Ulcerative colitis (UC)  | 563,10 ; 563,99 ; 569,02 | 556              | K51               |
| Crohn's disease (CD)     | 563,00                   | 555              | K50               |
| IBD unclassified (IBD-U) | UC+CD                    | UC+CD            | UC + CD, or K52.3 |

**eTable 3. ICD Codes Used to Define Different Psychiatric Disorders and Suicide Attempts in the Study**

| <b>Psychiatric outcome</b>                                               | <b>ICD-8<br/>(1969-1986)</b>                               | <b>ICD-9<br/>(1987-1996)</b>                               | <b>ICD-10<br/>(1997-)</b>                                  |
|--------------------------------------------------------------------------|------------------------------------------------------------|------------------------------------------------------------|------------------------------------------------------------|
| <b>Primary outcomes:</b>                                                 |                                                            |                                                            |                                                            |
| Any psychiatric disorders                                                | Any code from specific categories of psychiatric disorders | Any code from specific categories of psychiatric disorders | Any code from specific categories of psychiatric disorders |
| Suicide attempts                                                         | E950-E959                                                  | E950-E959                                                  | X60-X84                                                    |
| <b>Secondary outcomes, specific categories of psychiatric disorders:</b> |                                                            |                                                            |                                                            |
| Psychotic disorders                                                      | 295, 297-299;                                              | 295, 297, 298;                                             | F20-F29                                                    |
| Mood disorders                                                           | 296, 300.40;                                               | 296, 300E, 311                                             | F30-F39                                                    |
| Anxiety disorders                                                        | 300.00-300.30,300.50-300.99, 307;                          | 300, 300A-300D, 300F-300X, 308-309                         | F40-F45, F48                                               |
| Eating disorders                                                         |                                                            | 307B, 307F;                                                | F50                                                        |
| Substance misuse                                                         | 291, 303, 304;                                             | 291, 303, 304, 305A, 305X                                  | F10-F19                                                    |
| Behavioral disorders                                                     | -                                                          | -                                                          | F91                                                        |
| Attention-deficit hyperactivity disorder                                 | -                                                          | 314                                                        | F90                                                        |
| Autism spectrum disorders                                                | -                                                          | 299A                                                       | F84.0, F84.1, F84.5, F84.8, F84.9                          |
| Intellectual disability                                                  | 310-315;                                                   | 317-319                                                    | F70-F79                                                    |
| Personality disorders                                                    | 301                                                        | 301                                                        | F60-F62, F69                                               |

Abbreviations: ICD, International Classification of Diseases

**eTable 4.** Extraintestinal Manifestations and Primary Sclerosing Cholangitis in Patients with Inflammatory Bowel Disease (IBD) As defined by *ICD-9* and *ICD-10* Codes

| <b>Complication</b>                                     | <b>ICD-9</b>     | <b>ICD-10</b>          |
|---------------------------------------------------------|------------------|------------------------|
|                                                         | <b>1987-1996</b> | <b>1997-</b>           |
| <b>Primary sclerosing cholangitis</b>                   | 576B             | K83.0                  |
| <b>Extra-intestinal manifestations</b>                  |                  |                        |
| Erythema nodosum                                        | 695C             | L52                    |
| Pyoderma gangrenosum                                    | -                | L88                    |
| Sweet syndrome                                          | -                | L98.2                  |
| Iridocyclitis                                           | 364              | H20                    |
| Arthropathy in Crohn's disease                          | 713B             | M07.4                  |
| Arthropathy in Ulcerative colitis                       | 713B             | M07.5                  |
| Other defined arthropathy in gastrointestinal disorders | -                | M07.6                  |
| Juvenile arthritis in Crohn's disease                   | -                | M09.1                  |
| Juvenile arthritis in Ulcerative colitis                | -                | M09.2                  |
| Bechterew's disease                                     | 720A             | M45                    |
| Spondylarthritis, inflammatory NOD                      | 720C, 720W, 720X | M460, M461, M468, M469 |
| Arthritis NOD                                           | -                | M139, M255             |

**eTable 5.** Surgery Codes Included in the Definitions of “Inflammatory Bowel Disease-Related Bowel Surgery and Perianal Surgery” (Since 1964)

| Classification of surgical procedures                                                | 6th revision                    | 7th revision |
|--------------------------------------------------------------------------------------|---------------------------------|--------------|
| <b>Colectomy</b>                                                                     |                                 |              |
| <b>1) Subtotal colectomy with end ileostomy</b>                                      |                                 |              |
| Colectomy and ileostomy with closure of the rectum                                   | 4651                            | JFH10        |
| Laparoscopic colectomy and ileostomy                                                 |                                 | JFH11        |
| Other colectomy                                                                      |                                 | JFH96        |
| <b>2) Colectomy with IRA (ileorectal anastomosis)</b>                                |                                 |              |
| Colectomy with ileorectal anastomosis                                                | 4650                            | JFH00        |
| Laparoscopic colectomy with ileorectal anastomosis                                   |                                 | JFH01        |
| Ileorectal anastomosis                                                               |                                 | JFC40        |
| Laparoscopic ileorectal anastomosis                                                  |                                 | JFC41        |
| Closure of enterostomy with anastomosis to the rectum                                |                                 | JFG29        |
| Closure of enterostomy with anastomosis to the colon                                 |                                 | JFG26        |
| <b>3) Partial colectomies</b>                                                        |                                 |              |
| Right-sided colectomy                                                                | 4641                            | JFB30, JFB31 |
| Resection of the colon transversum                                                   | 4643                            | JGB40, JFB41 |
| Left-sided colectomy                                                                 | 4640                            | JFB43, JFB44 |
| Resection of the sigmoid colon                                                       | 4644                            | JFB46, JFB47 |
| Other colon resection                                                                | 4649                            | JFB50, JFB51 |
| <b>4) Proctocolectomy with IPAA (ileal pouch-anal anastomosis)</b>                   |                                 |              |
| Colectomy, rectal mucosectomy and ileoanal anastomosis <i>without</i> ileostomy.     |                                 | JFH30        |
| Colectomy, rectal mucosectomy and ileoanal anastomosis <i>and</i> ileostomy.         |                                 | JFH33        |
| Mucosectomy and ileoanal anastomosis after previous colectomy.                       | 4654                            | JGB50        |
| Extirpation of rectum or making of an ileoanal anastomosis after previous colectomy. |                                 | JGB60        |
| <b>5) Continent ileostomy at time of colectomy</b>                                   |                                 |              |
| Proctocolectomy with continent ileostomy, Kock                                       | 4653                            | JFH40        |
| Converting a conventional ileostomy to a continent ileostomy                         |                                 | JFG60        |
| <b>6) Proctocolectomy</b>                                                            |                                 |              |
| Proctocolectomy with ileostomy                                                       | 4652                            | JFH20        |
| <b>7) Other bowel surgery</b>                                                        |                                 |              |
| Strictureplasty to the small bowel                                                   |                                 | JFA60        |
| Strictureplasty to the colon                                                         |                                 | JFA63        |
| Closure the small intestinal fistula                                                 |                                 | JFA76        |
| Closure of the fistula of the colon                                                  |                                 | JFA86        |
| Colonic and/or small bowel resection                                                 | 4630, 4631, 4640-4649           | JFB          |
| Formation of the stoma                                                               |                                 | JFF          |
| Operations on the intestinal stoma or reservoir                                      |                                 | JFG          |
| Other operation of the small bowel and/or colon                                      | 4660-4668, 4700-4739, 4790-4798 | JFW96        |
| Other laparoscopic operation of the small bowel and/or colon                         |                                 | JFW97        |
| Rectal resection                                                                     | 4820-4828                       | JGB          |



| <b>Classification of surgical procedures</b>                                 | <b>6th revision</b> | <b>7th revision</b> |
|------------------------------------------------------------------------------|---------------------|---------------------|
| <b>Colectomy</b>                                                             |                     |                     |
| <b>8) Perianal surgery</b>                                                   |                     |                     |
| Perianal incision and drainage                                               | 4900                | JHA00               |
| Dilatation of the anal sphincter                                             | 4960                | JHD00               |
| Lay open or excision of perianal fistula                                     | 4920, 4922-4924     | JHD20               |
| Partial lay open or excision of perianal fistula (including seton placement) | 4970-4971           | JHD30               |
| Completion lay open or excision of perianal fistula                          |                     | JHD33               |
| Excision of perianal fistula with advancement flap                           |                     | JHD50               |
| Occlusion of perianal fistula with collagen plug                             |                     | JHD60               |
| Occlusion of perianal fistula with fibrin glue                               |                     | JHD63               |
| Other anal or perianal surgery (e.g. examination under anesthesia)           | 4999                | JHW96               |

**eTable 6.** Hazard Ratios of Primary and Secondary Psychiatric Outcomes Diagnosed Before and After 18th Birthday in the Cohort of Patients With Childhood Onset (<18 Years) Stratified by type of IBD Diagnosis—Patients With IBD Compared With Matched General Population Reference Individuals

|                            | Before 18th birthday                                                                |                            |                      |         | After 18th birthday (follow-up starts after 18 years of age)                        |                           |                      |         |
|----------------------------|-------------------------------------------------------------------------------------|----------------------------|----------------------|---------|-------------------------------------------------------------------------------------|---------------------------|----------------------|---------|
|                            | No. of Outcomes /No. of Accumulated Person-Years (Incidence Rate/1000 Person-Years) |                            | Hazard Ratio (95%CI) | P Value | No. of Outcomes /No. of Accumulated Person-Years (Incidence Rate/1000 Person-Years) |                           | Hazard Ratio (95%CI) | P Value |
|                            | Inflammatory bowel disease                                                          | Reference individuals      |                      |         | Inflammatory bowel disease                                                          | Reference individuals     |                      |         |
| <b>Primary outcomes:</b>   |                                                                                     |                            |                      |         |                                                                                     |                           |                      |         |
| Any psychiatric disorders  | 507/24,053<br>(21.1)                                                                | 12,772/1,241,875<br>(10.3) | 2.1 (2.0-2.3)        | <.001   | 610/64,114<br>(9.5)                                                                 | 25,266/3,351,707<br>(7.5) | 1.3 (1.2-1.4)        | <.001   |
| Suicide attempts           | 27/25,275<br>(1.1)                                                                  | 1,337/1,264,821<br>(1.1)   | 1.0 (0.7-1.6)        | 0.82    | 90/71,050<br>(1.3)                                                                  | 2,998/3,566,910<br>(0.8)  | 1.5 (1.2-1.9)        | <.001   |
| <b>Secondary outcomes:</b> |                                                                                     |                            |                      |         |                                                                                     |                           |                      |         |
| Psychotic disorders        | 4/25,330<br>(0.2)                                                                   | 149/1,267,365<br>(0.1)     | 1.2 (0.5-3.3)        | 0.69    | 27/71,711<br>(0.4)                                                                  | 1366/3,588,044<br>(0.4)   | 1.0 (0.7-1.5)        | 0.97    |
| Mood disorders             | 122/25,096<br>(4.9)                                                                 | 2,989/1,263,193<br>(2.4)   | 2.1 (1.8-2.5)        | <.001   | 305/69,328<br>(4.4)                                                                 | 1,1031/3,521,471<br>(3.1) | 1.4 (1.3-1.6)        | <.001   |
| Anxiety disorders          | 288/24,578<br>(11.7)                                                                | 4,024/1,260,776<br>(3.2)   | 3.9 (3.4-4.3)        | <.001   | 385/67,674<br>(5.7)                                                                 | 14,736/3,496,221<br>(4.2) | 1.4 (1.2-1.5)        | <.001   |
| Eating disorders           | 48/25,223<br>(1.9)                                                                  | 1076/1,265,689<br>(0.9)    | 2.3 (1.7-3.0)        | <.001   | 34/71,234<br>(0.5)                                                                  | 1,467/3,579,842<br>(0.4)  | 1.2 (0.8-1.7)        | 0.35    |
| Substance misuse           | 54/25,260<br>(2.1)                                                                  | 3051/1,262,702<br>(2.4)    | 0.9 (0.7-1.1)        | 0.33    | 196/70,114<br>(2.8)                                                                 | 8,628/3,520,636<br>(2.5)  | 1.1 (1.0-1.3)        | 0.07    |
| Personality disorders      | 3/25,332<br>(0.1)                                                                   | 96/1,267,400<br>(0.1)      | 1.6 (0.5-5.0)        | 0.44    | 67/71,530<br>(0.9)                                                                  | 2,425/3,584,173<br>(0.7)  | 1.4 (1.1-1.8)        | 0.009   |
| Behavioral disorders       | 14/25,289<br>(0.6)                                                                  | 508/1,266,413<br>(0.4)     | 1.4 (0.8-2.4)        | 0.21    | 2/71,775<br>(0.0)                                                                   | 102/3,593,024<br>(0.0)    | 1.0 (0.2-4.0)        | 0.99    |

|                                          | Before 18th birthday                                                                |                          |                      |         | After 18th birthday (follow-up starts after 18 years of age)                        |                         |                      |         |
|------------------------------------------|-------------------------------------------------------------------------------------|--------------------------|----------------------|---------|-------------------------------------------------------------------------------------|-------------------------|----------------------|---------|
|                                          | No. of Outcomes /No. of Accumulated Person-Years (Incidence Rate/1000 Person-Years) |                          | Hazard Ratio (95%CI) | P Value | No. of Outcomes /No. of Accumulated Person-Years (Incidence Rate/1000 Person-Years) |                         | Hazard Ratio (95%CI) | P Value |
|                                          | Inflammatory bowel disease                                                          | Reference individuals    |                      |         | Inflammatory bowel disease                                                          | Reference individuals   |                      |         |
| Attention-deficit hyperactivity disorder | 83/25,155<br>(3.3)                                                                  | 3,627/1,258,793<br>(2.9) | 1.1 (0.9-1.4)        | 0.22    | 90/71,036<br>(1.3)                                                                  | 3641/3,557,316<br>(1.0) | 1.2 (1.0-1.5)        | 0.040   |
| Autism spectrum disorders                | 34/25,238<br>(1.3)                                                                  | 1,126/1,264,942<br>(0.9) | 1.5 (1.1-2.1)        | 0.017   | 38/71,483<br>(0.5)                                                                  | 1496/3,582,601<br>(0.4) | 1.3 (0.9-1.8)        | 0.13    |
| Intellectual disability                  | 20/25,257<br>(0.8)                                                                  | 641/1,265,603<br>(0.5)   | 1.6 (1.0-2.5)        | 0.045   | 9/71,593<br>(0.1)                                                                   | 570/3,588,292<br>(0.2)  | 0.8 (0.4-1.5)        | 0.48    |

**eTable 7.** Hazard Ratios of Primary and Secondary Psychiatric Outcomes Diagnosed Before and After 18th Birthday in the Cohort of Patients With Childhood Onset (<18 Years) Stratified by Type of IBD Diagnosis—Patients With IBD Compared With Matched General Population Reference Individuals

|                             | Ulcerative colitis                                                                  |                            |                      |         | Crohn's Disease                                                                     |                            |                      |         | IBD-unclassified                                                                    |                             |                      |         |
|-----------------------------|-------------------------------------------------------------------------------------|----------------------------|----------------------|---------|-------------------------------------------------------------------------------------|----------------------------|----------------------|---------|-------------------------------------------------------------------------------------|-----------------------------|----------------------|---------|
|                             | No. of Outcomes /No. of Accumulated Person-Years (Incidence Rate/1000 Person-Years) |                            | Hazard Ratio (95%CI) | P Value | No. of Outcomes /No. of Accumulated Person-Years (Incidence Rate/1000 Person-Years) |                            | Hazard Ratio (95%CI) | P Value | No. of Outcomes /No. of Accumulated Person-Years (Incidence Rate/1000 Person-Years) |                             | Hazard Ratio (95%CI) | P Value |
|                             | Patients                                                                            | Population                 |                      |         | Patients                                                                            | Population                 |                      |         | Patients                                                                            | Population                  |                      |         |
| <b>Before 18th birthday</b> |                                                                                     |                            |                      |         |                                                                                     |                            |                      |         |                                                                                     |                             |                      |         |
| <b>Primary outcomes:</b>    |                                                                                     |                            |                      |         |                                                                                     |                            |                      |         |                                                                                     |                             |                      |         |
| Any psychiatric disorders   | 205/<br>12,950<br>(15.8)                                                            | 6,060/<br>661,224<br>(9.2) | 1.8<br>(1.5-2.0)     | <.001   | 229/<br>8,804<br>(26.0)                                                             | 5270/<br>460,147<br>(11.5) | 2.4<br>(2.1-2.7)     | <.001   | 73/<br>2,299<br>(31.7)                                                              | 1,442/<br>120,504<br>(12.0) | 2.8<br>(2.2-3.6)     | <.001   |
| Suicide attempts            | 14/<br>13,441<br>(1.0)                                                              | 669/<br>672,356<br>(1.0)   | 1.0<br>(0.6-1.9)     | 0.89    | 8/<br>9,398<br>(0.9)                                                                | 544/<br>469,523<br>(1.2)   | 0.7<br>(0.3-1.6)     | 0.39    | 5/<br>2,436<br>(2.1)                                                                | 124/<br>122,942<br>(1.0)    | 2.7<br>(1.1-6.7)     | 0.031   |
| <b>Secondary outcomes,:</b> |                                                                                     |                            |                      |         |                                                                                     |                            |                      |         |                                                                                     |                             |                      |         |
| Psychotic disorders         | 1/<br>13,467<br>(0.1)                                                               | 78/<br>673,635<br>(0.1)    | 0.6<br>(0.1-4.5)     | 0.63    | 2/<br>9,415<br>(0.2)                                                                | 60/<br>470,548<br>(0.1)    | 1.4<br>(0.3-5.9)     | 0.63    | 1/<br>2,448<br>(0.4)                                                                | 11/<br>123,182<br>(0.1)     | 4.2<br>(0.5 - 32.8)  | 0.17    |
| Mood disorders              | 51/<br>13,378<br>(3.8)                                                              | 1,511/<br>671,484<br>(2.3) | 1.7<br>(1.3-2.3)     | <.001   | 57/<br>9,286<br>(6.1)                                                               | 1,163/<br>468,930<br>(2.5) | 2.5<br>(1.9-3.3)     | <.0001  | 14/<br>2,432<br>(5.8)                                                               | 315/<br>122,779<br>(2.6)    | 2.3<br>(1.4-4.0)     | <.001   |
| Anxiety disorders           | 100/<br>13,223<br>(7.6)                                                             | 1,901/<br>670,410<br>(2.8) | 2.7<br>(2.2-3.4)     | <.001   | 138/<br>9,016<br>(15.3)                                                             | 1,650/<br>467,888<br>(3.5) | 4.6<br>(3.9-5.5)     | <.0001  | 50/<br>2,339<br>(21.4)                                                              | 473/<br>122,479<br>(3.9)    | 6.0<br>(4.5-8.1)     | <.001   |
| Eating disorders            | 18/<br>13,424<br>(1.3)                                                              | 544/<br>672,761<br>(0.8)   | 1.6<br>(1.0-2.6)     | 0.040   | 22/<br>9,359<br>(2.4)                                                               | 437/<br>469,907<br>(0.9)   | 2.6<br>(1.7-4.0)     | <.0001  | 8/<br>2,440<br>(3.3)                                                                | 95/<br>123,021<br>(0.8)     | 4.4<br>(2.1-9.1)     | <.001   |
| Substance misuse            | 29/<br>13,434<br>(2.2)                                                              | 1422/<br>671,448<br>(2.1)  | 1.0<br>(0.7-1.4)     | 1.00    | 20/<br>9,385<br>(2.1)                                                               | 1,297/<br>468,557<br>(2.8) | 0.8<br>(0.5-1.2)     | 0.23    | 5/<br>2,441<br>(2.0)                                                                | 332/<br>122,698<br>(2.7)    | 0.8<br>(0.3-1.9)     | 0.57    |
| Personality disorders       | 2/<br>13,467<br>(0.1)                                                               | 42/<br>673,657<br>(0.1)    | 2.6<br>(0.6 - 11.0)  | 0.18    | 1/<br>9,415<br>(0.1)                                                                | 41/<br>470,570<br>(0.1)    | 1.1<br>(0.2-8.2)     | 0.91    | 0/<br>2,450<br>(0.0)                                                                | 13/<br>123,173<br>(0.1)     | -                    | 0.99    |
| Behavioral disorders        | 3/<br>13,458                                                                        | 252/<br>673,165            | 0.6                  | 0.38    | 9/<br>9,382                                                                         | 198/<br>470,191            | 2.3                  | <.05    | 2/<br>2,449                                                                         | 58/<br>123,057              | 1.8                  | 0.43    |

|                                                                     | Ulcerative colitis                                                                  |                      |                      |         | Crohn's Disease                                                                     |                     |                      |         | IBD-unclassified                                                                    |                   |                      |         |
|---------------------------------------------------------------------|-------------------------------------------------------------------------------------|----------------------|----------------------|---------|-------------------------------------------------------------------------------------|---------------------|----------------------|---------|-------------------------------------------------------------------------------------|-------------------|----------------------|---------|
|                                                                     | No. of Outcomes /No. of Accumulated Person-Years (Incidence Rate/1000 Person-Years) |                      | Hazard Ratio (95%CI) | P Value | No. of Outcomes /No. of Accumulated Person-Years (Incidence Rate/1000 Person-Years) |                     | Hazard Ratio (95%CI) | P Value | No. of Outcomes /No. of Accumulated Person-Years (Incidence Rate/1000 Person-Years) |                   | Hazard Ratio (95%CI) | P Value |
|                                                                     | Patients                                                                            | Population           |                      |         | Patients                                                                            | Population          |                      |         | Patients                                                                            | Population        |                      |         |
|                                                                     | (0.2)                                                                               | (0.4)                | (0.2-1.9)            |         | (1.0)                                                                               | (0.4)               | (1.2-4.6)            |         | (0.8)                                                                               | (0.5)             | (0.4-7.3)            |         |
| Attention-deficit hyperactivity disorder                            | 45/<br>13,354                                                                       | 1,669/<br>669,556    | 1.4                  | 0.042   | 32/<br>9,362                                                                        | 1523/<br>467,000    | 1.1                  | 0.74    | 6/<br>2,439                                                                         | 435/<br>122,236   | 0.7                  | 0.31    |
|                                                                     | (3.4)                                                                               | (2.5)                | (1.0-1.8)            |         | (3.4)                                                                               | (3.3)               | (0.7-1.5)            |         | (2.5)                                                                               | (3.6)             | (0.3-1.5)            |         |
| Autism spectrum disorders                                           | 22/<br>13,397                                                                       | 532/<br>672,411      | 2.1                  | <.001   | 10/<br>9,397                                                                        | 475/<br>469,584     | 1.0                  | 0.91    | 2/<br>2,444                                                                         | 119/<br>122,947   | 0.9                  | 0.83    |
|                                                                     | (1.6)                                                                               | (0.8)                | (1.4-3.2)            |         | (1.1)                                                                               | (1.0)               | (0.6-1.9)            |         | (0.8)                                                                               | (1.0)             | (0.2-3.5)            |         |
| Intellectual disability                                             | 10/13,424                                                                           | 309/<br>672,727      | 1.7                  | 0.12    | 5/<br>9,391                                                                         | 261/<br>469,875     | 1.0                  | 0.93    | 5/<br>2,442                                                                         | 71/<br>123,002    | 3.4                  | <.001   |
|                                                                     | (0.7)                                                                               | (0.5)                | (0.9-3.1)            |         | (0.5)                                                                               | (0.6)               | (0.4-2.3)            |         | (2.0)                                                                               | (0.6)             | (1.4-8.5)            |         |
| <b>After 18th birthday (follow-up starts after 18 years of age)</b> |                                                                                     |                      |                      |         |                                                                                     |                     |                      |         |                                                                                     |                   |                      |         |
| <b>Primary outcomes:</b>                                            |                                                                                     |                      |                      |         |                                                                                     |                     |                      |         |                                                                                     |                   |                      |         |
| Any psychiatric disorders                                           | 318/<br>34,951                                                                      | 13,440/<br>1,805,548 | 1.2                  | <.001   | 240/<br>23,398                                                                      | 9,422/<br>1,234,544 | 1.4                  | <.0001  | 52/<br>5,765                                                                        | 2,404/<br>311,615 | 1.2                  | 0.21    |
|                                                                     | (9.1)                                                                               | (7.4)                | (1.1-1.4)            |         | (10.3)                                                                              | (7.6)               | (1.2-1.5)            |         | (9.0)                                                                               | (7.7)             | (0.9-1.6)            |         |
| Suicide attempts                                                    | 40/<br>38,199                                                                       | 1,647/<br>1,918,618  | 1.2                  | 0.20    | 39/<br>26,279                                                                       | 1091/<br>1,315,553  | 1.8                  | <.001   | 11/<br>6,572                                                                        | 260/<br>332,739   | 2.1                  | 0.013   |
|                                                                     | (1.0)                                                                               | (0.9)                | (0.9-1.7)            |         | (1.5)                                                                               | (0.8)               | (1.3-2.5)            |         | (1.7)                                                                               | (0.8)             | (1.2-3.9)            |         |
| <b>Secondary outcomes:</b>                                          |                                                                                     |                      |                      |         |                                                                                     |                     |                      |         |                                                                                     |                   |                      |         |
| Psychotic disorders                                                 | 13/<br>38,551                                                                       | 735/<br>1,930,432    | 0.9                  | 0.65    | 13/<br>26,459                                                                       | 512/<br>1,323,026   | 1.3                  | 0.35    | 1/<br>6,701                                                                         | 119/<br>334,585   | 0.4                  | 0.38    |
|                                                                     | (0.3)                                                                               | (0.4)                | (0.5-1.5)            |         | (0.5)                                                                               | (0.4)               | (0.7-2.3)            |         | (0.1)                                                                               | (0.4)             | (0.1-3.0)            |         |
| Mood disorders                                                      | 160/<br>37,311                                                                      | 5,909/<br>1,893,727  | 1.4                  | <.001   | 113/<br>25,600                                                                      | 4,092/<br>1,299,312 | 1.4                  | <.001   | 32/<br>6,417                                                                        | 1030/<br>328,432  | 1.6                  | 0.007   |
|                                                                     | (4.3)                                                                               | (3.1)                | (1.2-1.6)            |         | (4.4)                                                                               | (3.1)               | (1.2-1.7)            |         | (5.0)                                                                               | (3.1)             | (1.1-2.3)            |         |
| Anxiety disorders                                                   | 204/<br>36,816                                                                      | 7,976/<br>1,880,492  | 1.3                  | <.001   | 151/<br>24,725                                                                      | 5,416/<br>1,290,005 | 1.5                  | <.0001  | 30/<br>6,133                                                                        | 1344/<br>325,724  | 1.2                  | 0.32    |
|                                                                     | (5.5)                                                                               | (4.2)                | (1.1-1.5)            |         | (6.1)                                                                               | (4.2)               | (1.2-1.7)            |         | (4.9)                                                                               | (4.1)             | (0.8-1.7)            |         |
| Eating disorders                                                    | 16/<br>38,360                                                                       | 772/<br>1,926,160    | 1.0                  | 0.87    | 15/<br>26,250                                                                       | 546/<br>1319763     | 1.4                  | 0.20    | 3/<br>6,624                                                                         | 149/<br>333,919   | 1.1                  | 0.92    |
|                                                                     | (0.4)                                                                               | (0.4)                | (0.6-1.7)            |         | (0.6)                                                                               | (0.4)               | (0.8-2.3)            |         | (0.5)                                                                               | (0.4)             | (0.3-3.3)            |         |
| Substance misuse                                                    | 101/<br>37,751                                                                      | 4,559/<br>1,895,517  | 1.1                  | 0.29    | 84/<br>25,808                                                                       | 3,230/<br>1297044   | 1.3                  | 0.015   | 11/<br>6,555                                                                        | 839/<br>328,075   | 0.6                  | 0.15    |
|                                                                     | (2.7)                                                                               | (2.4)                | (0.9-1.4)            |         | (3.3)                                                                               | (2.5)               | (1.1-1.6)            |         | (1.7)                                                                               | (2.6)             | (0.4-1.2)            |         |

|                                          | Ulcerative colitis                                                                  |                     |                      |         | Crohn's Disease                                                                     |                     |                      |         | IBD-unclassified                                                                    |                 |                      |         |
|------------------------------------------|-------------------------------------------------------------------------------------|---------------------|----------------------|---------|-------------------------------------------------------------------------------------|---------------------|----------------------|---------|-------------------------------------------------------------------------------------|-----------------|----------------------|---------|
|                                          | No. of Outcomes /No. of Accumulated Person-Years (Incidence Rate/1000 Person-Years) |                     | Hazard Ratio (95%CI) | P Value | No. of Outcomes /No. of Accumulated Person-Years (Incidence Rate/1000 Person-Years) |                     | Hazard Ratio (95%CI) | P Value | No. of Outcomes /No. of Accumulated Person-Years (Incidence Rate/1000 Person-Years) |                 | Hazard Ratio (95%CI) | P Value |
|                                          | Patients                                                                            | Population          |                      |         | Patients                                                                            | Population          |                      |         | Patients                                                                            | Population      |                      |         |
| Personality disorders                    | 37/<br>38,442                                                                       | 1,328/<br>1,928,298 | 1.4                  | 0.045   | 21/<br>26,426                                                                       | 890/<br>1,321,690   | 1.2                  | 0.45    | 9/<br>6,662                                                                         | 207/<br>334,185 | 2.1                  | 0.026   |
|                                          | (1.0)                                                                               | (0.7)               | (1.0-1.9)            |         | (0.8)                                                                               | (0.7)               | (0.8-1.8)            |         | (1.4)                                                                               | (0.6)           | (1.1-4.2)            |         |
| Behavioral disorders                     | 2/<br>38,616                                                                        | 61/<br>1,933,128    | 1.7                  | 0.48    | 0/<br>26,452                                                                        | 28/<br>1,324,913    | -                    | 0.99    | 0/<br>6,707                                                                         | 13/<br>334,983  | -                    | 0.99    |
|                                          | (0.1)                                                                               | (0.0)               | (0.4-6.8)            |         | (0.0)                                                                               | (0.0)               |                      |         | (0.0)                                                                               | (0.0)           |                      |         |
| Attention-deficit hyperactivity disorder | 41/<br>38,191                                                                       | 1,898/<br>1,915,383 | 1.1                  | 0.57    | 39/<br>26,210                                                                       | 1,429/<br>1,310,602 | 1.4                  | 0.05    | 10/<br>6,635                                                                        | 314/<br>331,331 | 1.6                  | 0.14    |
|                                          | (1.1)                                                                               | (1.0)               | (0.8-1.5)            |         | (1.5)                                                                               | (1.1)               |                      |         | (1.5)                                                                               | (0.9)           | (0.9-3.0)            |         |
| Autism spectrum disorders                | 17/<br>38,398                                                                       | 776/<br>1,927,827   | 1.1                  | 0.68    | 15/<br>26,409                                                                       | 590/<br>1,320,745   | 1.3                  | 0.34    | 6/<br>6,676                                                                         | 130/<br>334,028 | 2.3                  | 0.046   |
|                                          | (0.4)                                                                               | (0.4)               | (0.7-1.8)            |         | (0.6)                                                                               | (0.4)               | (0.8-2.1)            |         | (0.9)                                                                               | (0.4)           | (1.0-5.2)            |         |
| Intellectual disability                  | 4/<br>38,481                                                                        | 305/<br>1,930,599   | 0.7                  | 0.40    | 3/<br>26,480                                                                        | 207/<br>1,323,140   | 0.7                  | 0.59    | 2/<br>6,633                                                                         | 58/<br>334,553  | 1.7                  | 0.48    |
|                                          | (0.1)                                                                               | (0.2)               | (0.2-1.8)            |         | (0.1)                                                                               | (0.2)               | (0.2-2.3)            |         | (0.3)                                                                               | (0.2)           | (0.4-6.8)            |         |

**eTable 8.** Hazard Ratio of Primary and Secondary Psychiatric Outcomes in the Cohort of Patients With Childhood Onset (<18 Years) Stratified by Time After Cohort Entry (Diagnosis of Inflammatory Bowel Disease or Respected Date in Reference Individuals)—IBD Compared With Matched General Population Reference Individuals

|                            | Time after cohort entry                                                             |                            |                      |         |                                                                                     |                               |                      |         |                                                                                     |                               |                      |         |
|----------------------------|-------------------------------------------------------------------------------------|----------------------------|----------------------|---------|-------------------------------------------------------------------------------------|-------------------------------|----------------------|---------|-------------------------------------------------------------------------------------|-------------------------------|----------------------|---------|
|                            | <1 year                                                                             |                            |                      |         | 1 to 4 years                                                                        |                               |                      |         | >5 years                                                                            |                               |                      |         |
|                            | No. of Outcomes /No. of Accumulated Person-Years (Incidence Rate/1000 Person-Years) |                            | Hazard Ratio (95%CI) | P Value | No. of Outcomes /No. of Accumulated Person-Years (Incidence Rate/1000 Person-Years) |                               | Hazard Ratio (95%CI) | P Value | No. of Outcomes /No. of Accumulated Person-Years (Incidence Rate/1000 Person-Years) |                               | Hazard Ratio (95%CI) | P Value |
|                            | Patients                                                                            | Population                 |                      |         | Patients                                                                            | Population                    |                      |         | Patients                                                                            | Population                    |                      |         |
| <b>Primary outcomes:</b>   |                                                                                     |                            |                      |         |                                                                                     |                               |                      |         |                                                                                     |                               |                      |         |
| Any psychiatric disorders  | 204/<br>6,230<br>(32.7)                                                             | 3,030/<br>316,062<br>(9.6) | 3.5<br>(3.0-4.0)     | <.001   | 339/<br>27,332<br>(12.4)                                                            | 12,385/<br>1,407,739<br>(8.8) | 1.5<br>(1.3-1.6)     | <.001   | 574/<br>64,454<br>(8.9)                                                             | 22,629/<br>3,357,992<br>(6.7) | 1.3<br>(1.2-1.5)     | <.001   |
| Suicide attempts           | 10/<br>6,336<br>(1.6)                                                               | 482/<br>316,590<br>(1.5)   | 1.3<br>(0.5-3.1)     | 0.60    | 28/<br>28,749<br>(1.0)                                                              | 1,229/<br>1437573<br>(0.9)    | 1.1<br>(0.8-1.7)     | 0.50    | 79/<br>71,059<br>(1.1)                                                              | 2,624/<br>3,567,067<br>(0.7)  | 1.5<br>(1.2-1.9)     | <.001   |
| <b>Secondary outcomes:</b> |                                                                                     |                            |                      |         |                                                                                     |                               |                      |         |                                                                                     |                               |                      |         |
| Psychotic disorders        | 2/<br>6,346<br>(0.3)                                                                | 30/<br>317,467<br>(0.1)    | 3.3<br>(0.8 - 13.9)  | 0.10    | 5/<br>28,820<br>(0.2)                                                               | 289/<br>1,441,336<br>(0.2)    | 0.9<br>(0.4-2.1)     | 0.75    | 24/<br>71,703<br>(0.3)                                                              | 1,196/<br>3,587,692<br>(0.3)  | 1.0<br>(0.7-1.5)     | 0.96    |
| Mood disorders             | 41/<br>6,324<br>(6.5)                                                               | 586/<br>317,224<br>(1.8)   | 3.5<br>(2.6-4.8)     | <.001   | 106/<br>28,449<br>(3.7)                                                             | 3,524/<br>1,433,827<br>(2.5)  | 1.5<br>(1.3-1.8)     | <.001   | 280/<br>69,402<br>(4.0)                                                             | 9,912/<br>3,521,947<br>(2.8)  | 1.4<br>(1.3-1.6)     | <.001   |
| Anxiety disorders          | 130/<br>6,267<br>(20.7)                                                             | 814/<br>317,114<br>(2.6)   | 8.2<br>(6.8-9.9)     | <.001   | 190/<br>27,961<br>(6.8)                                                             | 4,726/<br>1,431,072<br>(3.3)  | 2.1<br>(1.8-2.5)     | <.001   | 353/<br>67,766<br>(5.2)                                                             | 13,223/<br>3,496,636<br>(3.8) | 1.4<br>(1.3-1.5)     | <.001   |
| Eating disorders           | 16/<br>6,339<br>(2.5)                                                               | 249/<br>317,373<br>(0.8)   | 3.2<br>(2.0-5.4)     | <.001   | 36/<br>28,706<br>(1.3)                                                              | 942/<br>1,439,228<br>(0.7)    | 1.9<br>(1.4-2.7)     | <.001   | 30/<br>71,267<br>(0.4)                                                              | 1,352/<br>3,580,870<br>(0.4)  | 1.1<br>(0.8-1.6)     | 0.53    |
| Substance misuse           | 8/<br>6,344<br>(1.3)                                                                | 704/<br>317,158<br>(2.2)   | 0.6<br>(0.3-1.1)     | 0.11    | 68/<br>28,696<br>(2.4)                                                              | 3,686/<br>1,432,553<br>(2.6)  | 0.9<br>(0.7-1.2)     | 0.49    | 174/<br>70,118<br>(2.5)                                                             | 7,292/<br>3,520,078<br>(2.1)  | 1.2<br>(1.0-1.4)     | 0.018   |
| Personality disorders      | 1/<br>6,347<br>(0.2)                                                                | 25/<br>317,470<br>(0.1)    | 2.0<br>(0.3 - 14.8)  | 0.50    | 10/<br>28,813<br>(0.3)                                                              | 436/<br>1,441,146<br>(0.3)    | 1.1<br>(0.6-2.2)     | 0.66    | 59/<br>71,505<br>(0.8)                                                              | 2,060/<br>3,583,053<br>(0.6)  | 1.4<br>(1.1-1.9)     | 0.007   |
| Behavioral disorders       | 4/<br>6,346                                                                         | 89/<br>317,441             | 2.2                  | 0.11    | 7/<br>28,813                                                                        | 302/<br>1,441,017             | 1.2                  | 0.71    | 5/<br>71,799                                                                        | 219/<br>3,594,015             | 1.2                  | 0.72    |

|                           | Time after cohort entry                                                             |                 |                      |         |                                                                                     |                     |                      |          |                                                                                     |                     |                      |         |
|---------------------------|-------------------------------------------------------------------------------------|-----------------|----------------------|---------|-------------------------------------------------------------------------------------|---------------------|----------------------|----------|-------------------------------------------------------------------------------------|---------------------|----------------------|---------|
|                           | <1 year                                                                             |                 |                      |         | 1 to 4 years                                                                        |                     |                      | >5 years |                                                                                     |                     |                      |         |
|                           | No. of Outcomes /No. of Accumulated Person-Years (Incidence Rate/1000 Person-Years) |                 | Hazard Ratio (95%CI) | P Value | No. of Outcomes /No. of Accumulated Person-Years (Incidence Rate/1000 Person-Years) |                     | Hazard Ratio (95%CI) | P Value  | No. of Outcomes /No. of Accumulated Person-Years (Incidence Rate/1000 Person-Years) |                     | Hazard Ratio (95%CI) | P Value |
|                           | Patients                                                                            | Population      |                      |         | Patients                                                                            | Population          |                      |          | Patients                                                                            | Population          |                      |         |
|                           | (0.6)                                                                               | (0.3)           | (0.8-6.1)            |         | (0.2)                                                                               | (0.2)               | (0.5-2.4)            |          | (0.1)                                                                               | (0.1)               | (0.5-2.8)            |         |
| ADHD                      | 11/<br>6,342                                                                        | 749/<br>317,128 | 0.7                  | 0.31    | 65/<br>28,679                                                                       | 2,599/<br>1,434,566 | 1.3                  | 0.07     | 97/<br>71,163                                                                       | 3,921/<br>3,562,199 | 1.2                  | 0.031   |
|                           | (1.7)                                                                               | (2.4)           | (0.4-1.3)            |         | (2.3)                                                                               | (1.8)               | (1.0-1.6)            |          | (1.4)                                                                               | (1.1)               | (1.0-1.5)            |         |
| Autism spectrum disorders | 7/<br>6,343                                                                         | 179/<br>317,399 | 2.0                  | 0.08    | 28/<br>28,760                                                                       | 949/<br>1,439,588   | 1.5                  | 0.041    | 37/<br>71,520                                                                       | 1,494/<br>3,584,001 | 1.2                  | 0.18    |
|                           | (1.1)                                                                               | (0.6)           | (0.9-4.2)            |         | (1.0)                                                                               | (0.7)               | (1.0-2.2)            |          | (0.5)                                                                               | (0.4)               | (0.9-1.7)            |         |
| Intellectual disability   | 2/<br>6,346                                                                         | 137/<br>317,409 | 0.7                  | 0.66    | 10/<br>28,807                                                                       | 526/<br>1,440,254   | 1.0                  | 0.88     | 17/<br>71,665                                                                       | 549/<br>3,588,846   | 1.6                  | 0.07    |
|                           | (0.3)                                                                               | (0.4)           | (0.2-2.9)            |         | (0.3)                                                                               | (0.4)               | (0.5-1.8)            |          | (0.2)                                                                               | (0.2)               | (1.0-2.5)            |         |



**eTable 9.** Hazard Ratio of the First Ever Event of Any Psychiatric Disorders in the Cohort of Patients With Childhood Onset (<18 Years)—IBD Compared With Matched General Population Reference Individuals

|                                                       | Any psychiatric disorders                                                           |                            |                      |         | Suicide attempts                                                                    |                          |                      |         |
|-------------------------------------------------------|-------------------------------------------------------------------------------------|----------------------------|----------------------|---------|-------------------------------------------------------------------------------------|--------------------------|----------------------|---------|
|                                                       | No. of Outcomes /No. of Accumulated Person-Years (Incidence Rate/1000 Person-Years) |                            | Hazard Ratio (95%CI) | P Value | No. of Outcomes /No. of Accumulated Person-Years (Incidence Rate/1000 Person-Years) |                          | Hazard Ratio (95%CI) | P Value |
|                                                       | Inflammatory bowel disease                                                          | Reference individuals      |                      |         | Inflammatory bowel disease                                                          | Reference individuals    |                      |         |
| <b>Sex</b>                                            |                                                                                     |                            |                      |         |                                                                                     |                          |                      |         |
| Males                                                 | 543/37,515<br>(14.5)                                                                | 19,403/1,932,856<br>(10.0) | 1.5 (1.3-1.6)        | <.001   | 39/40,354<br>(1.0)                                                                  | 1,731/2,024,216<br>(0.9) | 1.2 (0.9-1.6)        | 0.30    |
| Females                                               | 574/27,988<br>(20.5)                                                                | 18,641/1,463,491<br>(12.7) | 1.7 (1.5-1.8)        | <.001   | 78/30,793<br>(2.5)                                                                  | 2,604/1,546,195<br>(1.7) | 1.5 (1.2-1.9)        | <.001   |
| <b>Age of cohort entry</b>                            |                                                                                     |                            |                      |         |                                                                                     |                          |                      |         |
| < 6 years                                             | 66/3,657<br>(18.0)                                                                  | 1554/196,681<br>(7.9)      | 2.4 (1.9-3.1)        | <.001   | 3/3,992<br>(0.8)                                                                    | 125/203,602<br>(0.6)     | 1.3 (0.4-4.0)        | 0.69    |
| < 10 years                                            | 224/12,795<br>(17.5)                                                                | 6118/667,339<br>(9.2)      | 2.0 (1.7-2.3)        | <.001   | 21/13,996<br>(1.5)                                                                  | 587/696,553<br>(0.8)     | 1.8 (1.2-2.8)        | 0.009   |
| < 15 years                                            | 710/42,340<br>(16.8)                                                                | 23449/2,208,489<br>(10.6)  | 1.6 (1.5-1.8)        | <.001   | 70/46,076<br>(1.5)                                                                  | 2,468/2,319,533<br>(1.1) | 1.5 (1.2-1.9)        | 0.002   |
| < 17 years                                            | 993/57,486<br>(17.3)                                                                | 33285/3,006,887<br>(11.1)  | 1.6 (1.5-1.7)        | <.001   | 100/62,672<br>(1.6)                                                                 | 3,702/3,161,679<br>(1.2) | 1.4 (1.1-1.7)        | 0.002   |
| <b>ICD classification at the time of cohort entry</b> |                                                                                     |                            |                      |         |                                                                                     |                          |                      |         |
| ICD-8 (1973-1986)                                     | 30/4,951<br>(6.1)                                                                   | 1,228/250,610<br>(4.9)     | 1.3 (0.9-1.8)        | 0.21    | 0/5,230<br>(0.0)                                                                    | 127/259,969<br>(0.5)     | -                    | 0.98    |
| ICD-9 (1987-1996)                                     | 261/24,787<br>(10.5)                                                                | 9,206/1,272,733<br>(7.2)   | 1.5 (1.3-1.7)        | <.001   | 47/26,424<br>(1.8)                                                                  | 1,207/1,331,816<br>(0.9) | 2.0 (1.5-2.6)        | <.001   |
| ICD-10 (1997-2013)                                    | 826/35,765<br>(23.1)                                                                | 2,7610/1,873,004<br>(14.7) | 1.6 (1.5-1.7)        | <.001   | 70/39,493<br>(1.8)                                                                  | 3,001/1,978,626<br>(1.5) | 1.2 (0.9-1.5)        | 0.14    |
| <b>Source of data at the time of cohort entry</b>     |                                                                                     |                            |                      |         |                                                                                     |                          |                      |         |
| Inpatient register (prior to 2002)                    | 574/20,931<br>(27.4)                                                                | 18,455/1,103,965<br>(16.7) | 1.7 (1.5-1.8)        | <.001   | 40/23,216<br>(1.7)                                                                  | 1,875/1,161,475<br>(1.6) | 1.1 (0.8-1.5)        | 0.73    |
| In-and out-patient (since 2002)                       | 543/44,572<br>(12.2)                                                                | 19,589/2,292,381<br>(8.5)  | 1.4 (1.3-1.6)        | <.001   | 77/47,932<br>(1.6)                                                                  | 2,460/2,408,936<br>(1.0) | 1.6 (1.3-2.0)        | <.001   |
| <b>Complications during follow-up</b>                 |                                                                                     |                            |                      |         |                                                                                     |                          |                      |         |
| Extra intestinal manifestation                        | 166/7,622<br>(21.8)                                                                 | 4,478/399,447<br>(11.2)    | 2.0 (1.7-2.4)        | <.001   | 16/8,485<br>(1.9)                                                                   | 549/420,346<br>(1.3)     | 1.5 (0.9-2.5)        | 0.10    |

|                                     | Any psychiatric disorders                                                           |                       |                      |         | Suicide attempts                                                                    |                       |                      |         |
|-------------------------------------|-------------------------------------------------------------------------------------|-----------------------|----------------------|---------|-------------------------------------------------------------------------------------|-----------------------|----------------------|---------|
|                                     | No. of Outcomes /No. of Accumulated Person-Years (Incidence Rate/1000 Person-Years) |                       | Hazard Ratio (95%CI) | P Value | No. of Outcomes /No. of Accumulated Person-Years (Incidence Rate/1000 Person-Years) |                       | Hazard Ratio (95%CI) | P Value |
|                                     | Inflammatory bowel disease                                                          | Reference individuals |                      |         | Inflammatory bowel disease                                                          | Reference individuals |                      |         |
| Primary sclerosing cholangitis      | 102/6,297 (16.2)                                                                    | 3,424/330,010 (10.4)  | 1.6 (1.3-1.9)        | <.001   | 10/6,888 (1.5)                                                                      | 363/347,166 (1.0)     | 1.3 (0.7-2.5)        | 0.42    |
| <b>IBD Surgery</b>                  |                                                                                     |                       |                      |         |                                                                                     |                       |                      |         |
| Bowel surgery                       | 208/13,020 (16.0)                                                                   | 5,924/677,888 (8.7)   | 1.9 (1.6-2.2)        | <.001   | 27/14,238 (1.9)                                                                     | 748/711,565 (1.1)     | 1.8 (1.2-2.7)        | <.001   |
| Perianal surgery                    | 145/7,617 (19.0)                                                                    | 3,983/402,131 (9.9)   | 2.0 (1.7-2.4)        | <.001   | 17/8,502 (2.0)                                                                      | 457/422,517 (1.1)     | 1.8 (1.1-3.0)        | 0.019   |
| <b>Parental psychiatric history</b> | 24/ 260 (9.2)                                                                       | 746/16,796 (44.4)     | 3.4 (1.7-6.7)        | <.001   | 2/ 315 (6.3)                                                                        | 49/18,591 (2.6)       | -                    | 0.99    |
